# Supplementary material for: A hierarchical CoSx/Ni(OH)2 heterostructure as a bifunctional electrocatalyst for urea-assisted energy-efficient hydrogen production
Source: Royal Society of Chemistry journal article supplement (doi:10.1039/d4cc01253d), 2024-01-01
Supplement: d4cc01253d1.pdf [file d4cc01253d1.pdf]

## Supporting Information

### **Hierarchical CoS<sub>x</sub>/Ni(OH)<sub>2</sub> heterostructure as bifunctional electrocatalyst for urea-assisted energy-efficient hydrogen production**

Bin Sang,<sup>a</sup> Chaozhuang Xue,<sup>a</sup> Songyun Guo,<sup>b</sup> Xiaojun Wng,<sup>b</sup> Shuixiang Xie,<sup>b</sup> Changming Wang<sup>b</sup> and Rui-Qing Li,<sup>\*b</sup>

<sup>a</sup> School of Chemistry and Chemical Engineering, Liaocheng University, Liaocheng 252059, China

<sup>b</sup> School of Textile and Clothing, Nantong University, Nantong 226019, China

Corresponding Author E-mail: [liruiqing@ntu.edu.cn](mailto:liruiqing@ntu.edu.cn)

## Experimental

### Chemicals and materials

$\text{Co}(\text{NO}_3)_2 \cdot 6\text{H}_2\text{O}$ ,  $\text{NH}_4\text{F}$ ,  $\text{CH}_3\text{CSNH}_2$ ,  $\text{Ni}(\text{NO}_3)_2 \cdot 6\text{H}_2\text{O}$  and urea were provided from Sinopharm Chemical Reagent Co. Ltd. Nickel foam (NF) were provided from Taiyuan source of power company.

### Sample synthesis

#### Preparation of $\text{CoS}_x/\text{NF}$

A piece of NF ( $3 \times 2$  cm) was treated in HCl aqueous solution followed by subsequent washing of water and ethanol. Firstly, 2 mmol  $\text{Co}(\text{NO}_3)_2$ , 10 mmol urea and 6 mmol  $\text{NH}_4\text{F}$  were added in water and pre-treated NF was added into above solution. Secondly, after heating at  $120^\circ\text{C}$  for 6 h  $\text{Co}(\text{OH})_2/\text{NF}$  was obtained. Thirdly, the  $\text{Co}(\text{OH})_2/\text{NF}$  was added to  $\text{CH}_3\text{CSNH}_2$  solution and maintained at  $200^\circ\text{C}$  for 6 h to prepare  $\text{CoS}_x/\text{NF}$ .

#### Preparation of $\text{CoS}_x/\text{Ni}(\text{OH})_2/\text{NF}$

The  $\text{CoS}_x/\text{NF}$  was immersed mixed solution contained 0.5 mmol  $\text{Ni}(\text{NO}_3)_2$  and 2 mmol urea, which was heated for 6 h at  $120^\circ\text{C}$ . Thereafter,  $\text{CoS}_x/\text{Ni}(\text{OH})_2/\text{NF}$  was obtained with chilling to room temperature.

### Materials characterization

The phase and microstructures were studied by X-ray diffraction (XRD, Bruker D8 diffractometer), scanning electron microscopy (SEM, S-4800) and transmission electron microscopy (TEM, FEI Talos F200X). Chemical valence states were analyzed via X-ray photo-electron spectrometer (XPS, Thermo ESCALAB 250).

### Electrochemical measurements

Electrochemical tests were performed on biologic VMP3 electrochemical workstation with obtained catalysts as working electrode. Polarization curves were carried out and corresponding potentials were rectified. Electrochemical impedance spectroscopy (EIS) was measured at a frequency range from 100 kHz to 0.1 Hz.

Figures

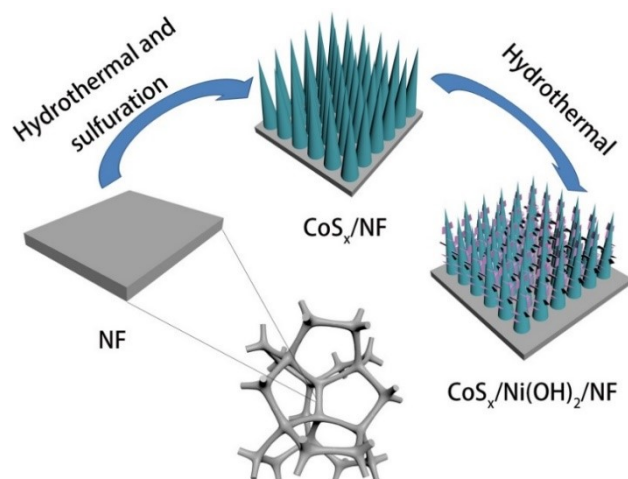

Fig. S1 Schematic illustration for preparing CoS<sub>x</sub>/Ni(OH)<sub>2</sub>/NF.

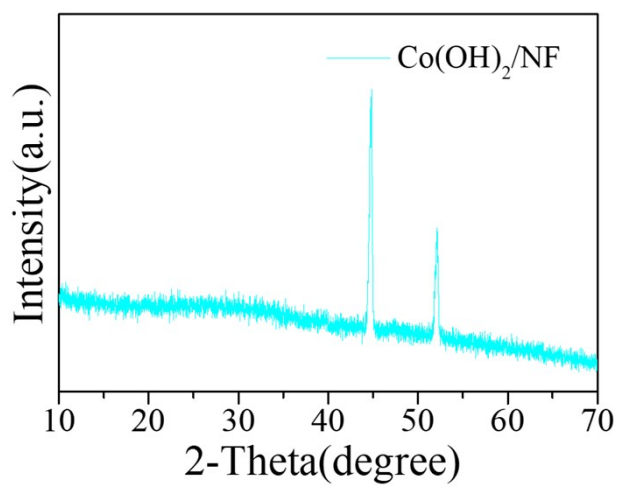

Fig. S2 XRD pattern of Co(OH)<sub>2</sub>/NF.

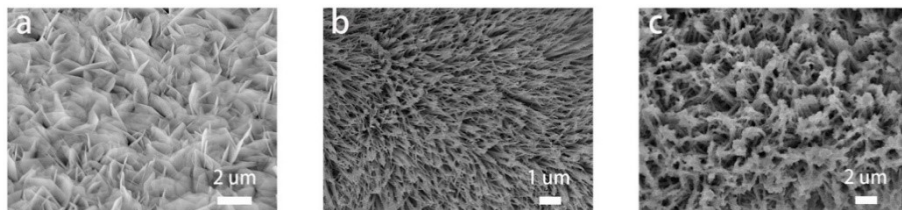

**Fig. S3** SEM image of of  $\text{Ni(OH)}_2/\text{NF}$  (a),  $\text{CoS}_x/\text{NF}$  (b),  $\text{CoS}_x/\text{Ni(OH)}_2/\text{NF}$  (c).

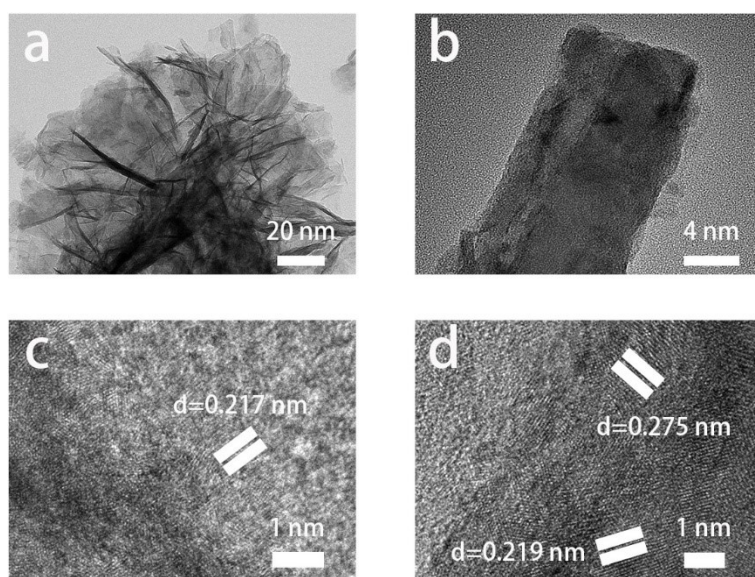

**Fig. S4** Low and high-resolution TEM images of  $\text{Ni(OH)}_2/\text{NF}$  (a, c) and  $\text{CoS}_x/\text{NF}$  (b, d).

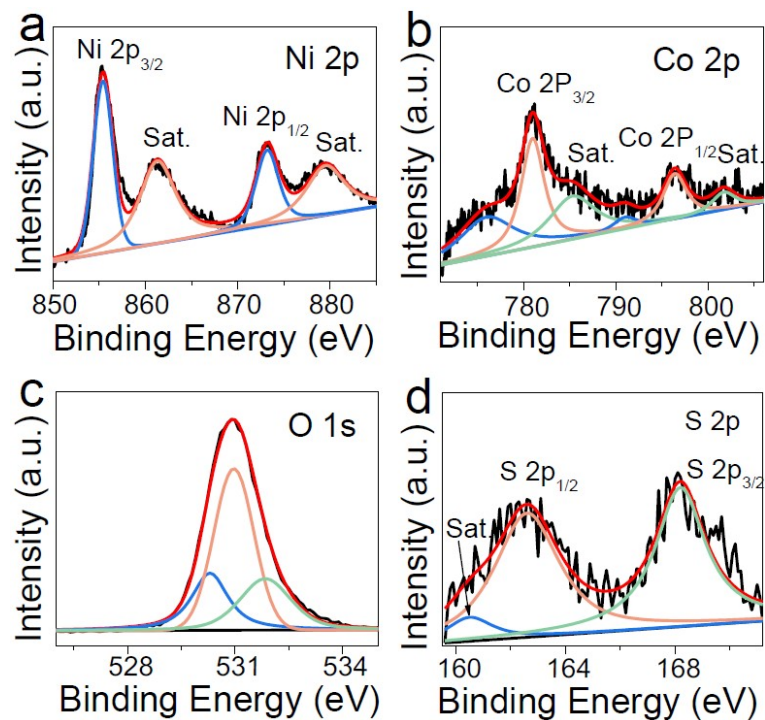

Fig. S5 XPS spectra of (a) Ni 2p, (b) Co 2p, (c) O 1s, and (d) S 2p for  $\text{CoS}_x/\text{Ni}(\text{OH})_2$ .

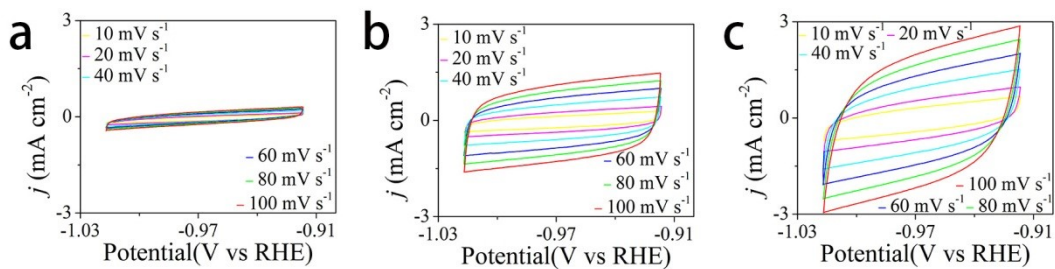

Fig. S6 CV curves of  $\text{Ni}(\text{OH})_2/\text{NF}$  (a),  $\text{CoS}_x/\text{NF}$  (b),  $\text{CoS}_x/\text{Ni}(\text{OH})_2/\text{NF}$  (c).

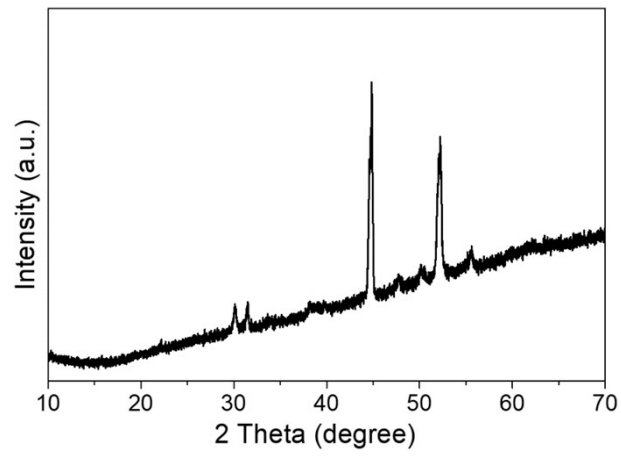

**Fig. S7** XRD pattern of  $\text{CoS}_x/\text{Ni}(\text{OH})_2/\text{NF}$  after the HER stability.

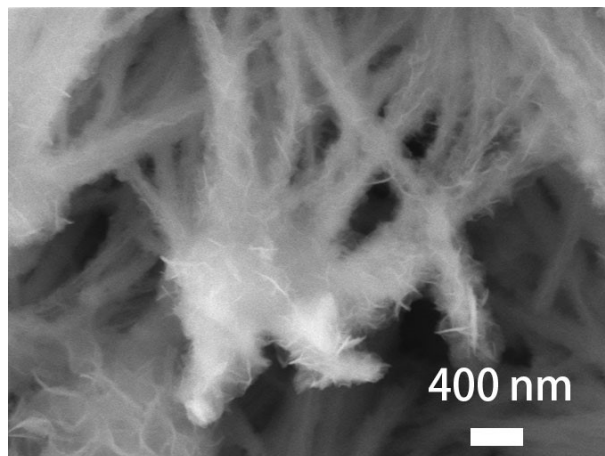

**Fig. S8** SEM image of  $\text{CoS}_x/\text{Ni}(\text{OH})_2/\text{NF}$  after the HER stability.

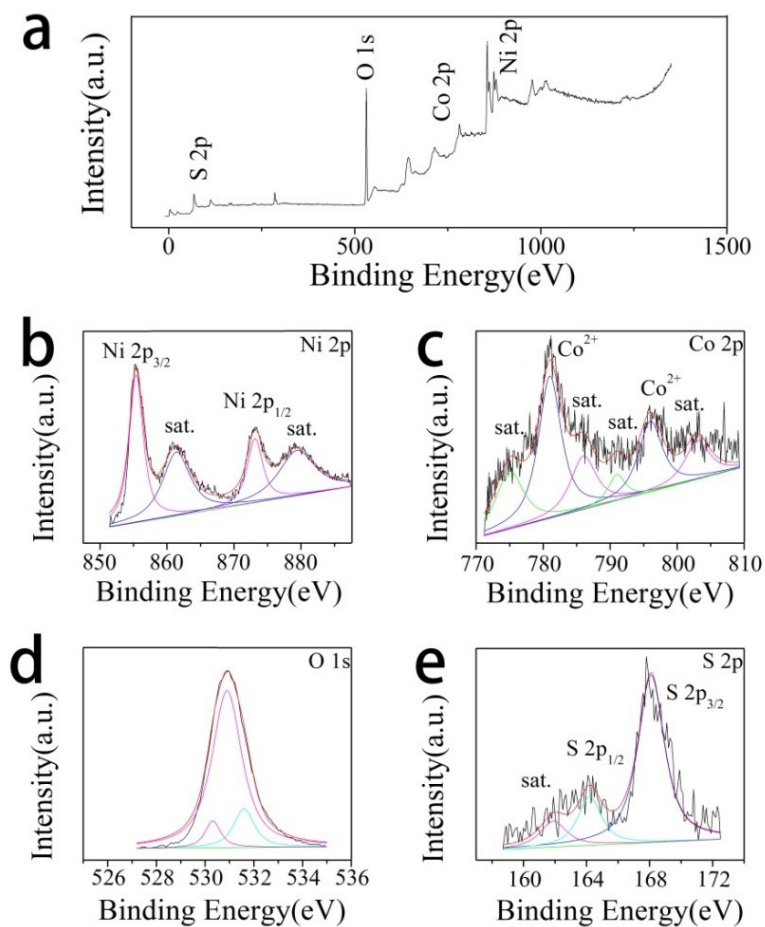

**Fig. S9** XPS spectra of (a) wide scan spectrum, (b) Ni 2p, (c) Co 2p, (d) O 1s, and (e) S 2p for CoS<sub>x</sub>/Ni(OH)<sub>2</sub>/NF after the HER stability.

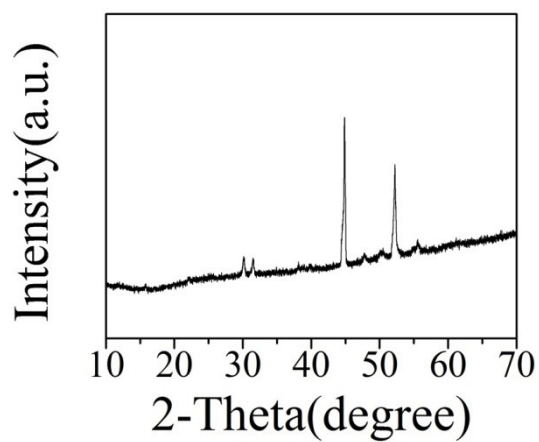

**Fig. S10** XRD pattern of CoS<sub>x</sub>/Ni(OH)<sub>2</sub>/NF after the UOR stability.

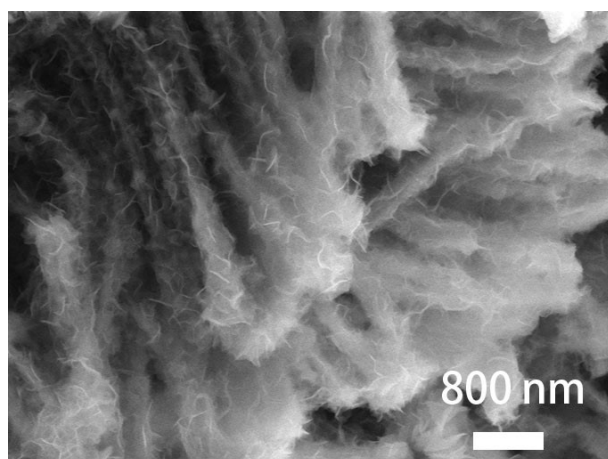

**Fig. S11** SEM image of  $\text{CoS}_x/\text{Ni(OH)}_2/\text{NF}$  after the UOR stability.

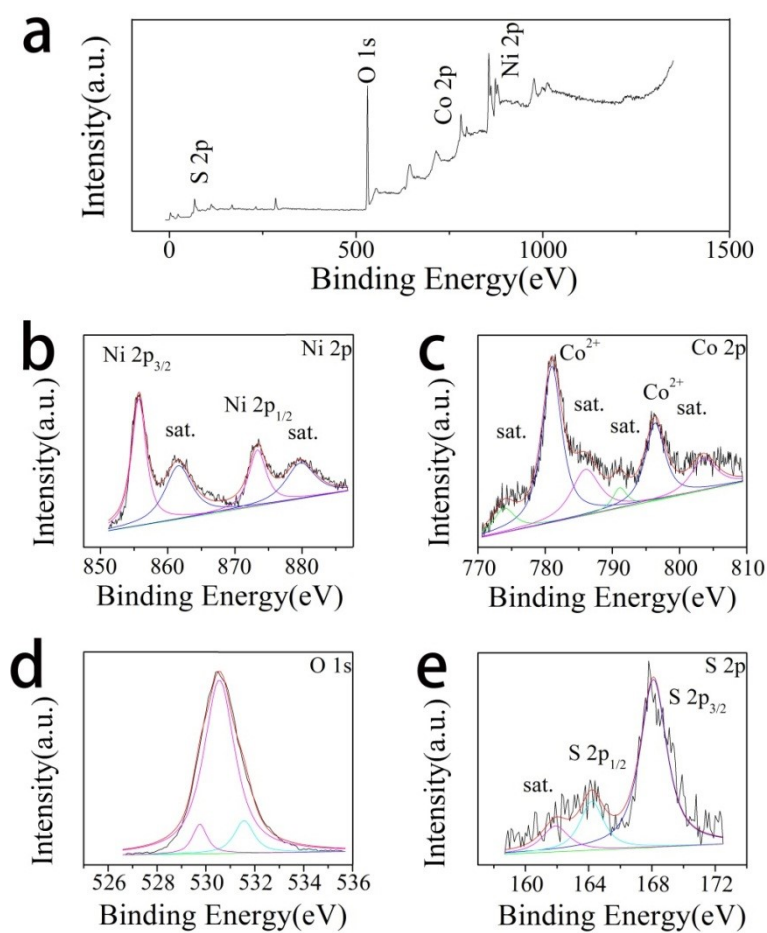

**Fig. S12** XPS spectra of (a) wide scan spectrum, (b) Ni 2p, (c) Co 2p, (d) O 1s, and (e) S 2p for  $\text{CoS}_x/\text{Ni(OH)}_2/\text{NF}$  after the UOR stability.



**Table S1.** Comparison of HER performance of CoS<sub>x</sub>/Ni(OH)<sub>2</sub>/NF with other reported catalysts.

| Catalysts                                                       | Overpotential (mV) at 10 mA<br>cm <sup>-2</sup> | Tafel slope (mV dec <sup>-1</sup> ) | References       |
|-----------------------------------------------------------------|-------------------------------------------------|-------------------------------------|------------------|
| <b>CoS<sub>x</sub>/Ni(OH)<sub>2</sub>/NF</b>                    | <b>148</b>                                      | <b>99</b>                           | <b>This work</b> |
| CoP/rGO                                                         | 150                                             | 38                                  | S1               |
| Ni(OH) <sub>2</sub> @Co <sub>3</sub> O <sub>4</sub> /NF         | 159                                             | 114                                 | S2               |
| Ni <sub>2</sub> P@NF                                            | 202                                             | 120                                 | S2               |
| Ni <sub>3</sub> S <sub>2</sub> nanorod array foam               | 200                                             | 107                                 | S3               |
| Ni <sub>3</sub> S <sub>2</sub> nanowires                        | 199.2                                           | 106.1                               | S4               |
| NCO NWs/NF                                                      | 175                                             | 157.84                              | S5               |
| NF-MoS <sub>2</sub> /Ni <sub>3</sub> S <sub>2</sub> -thiourea   | 187                                             | 93.41                               | S6               |
| NF-MoS <sub>2</sub> /Ni <sub>3</sub> S <sub>2</sub> -L-cysteine | 148                                             | 68.81                               | S6               |
| Co-W/CeO <sub>2</sub>                                           | 166                                             | 110                                 | S7               |
| Ni-S/CeO <sub>2</sub>                                           | 170                                             | 118                                 | S8               |
| Ni <sub>3</sub> FeN-NPs                                         | 158                                             | 42                                  | S9               |

**Table S2.** Comparison of UOR performance of CoS<sub>x</sub>/Ni(OH)<sub>2</sub>/NF in the 1.0 M KOH solution containing 0.5 M urea with other reported catalysts.

| Catalysts                                              | Voltage for urea electrolysis at $j$ (V @ mA cm <sup>-2</sup> ) | References       |
|--------------------------------------------------------|-----------------------------------------------------------------|------------------|
| <b>CoS<sub>x</sub>/Ni(OH)<sub>2</sub>/NF</b>           | <b>1.339@10</b><br><b>1.409@100</b>                             | <b>This work</b> |
| Fe <sub>2</sub> O <sub>3</sub> /NF                     | 1.41@10                                                         | [S10]            |
| Mo-Ni <sub>2</sub> P                                   | 1.41@10                                                         | [S11]            |
| Ni <sub>2</sub> P/CFC                                  | 1.42@10                                                         | [S12]            |
| P-CoS <sub>2</sub>                                     | 1.51@10                                                         | [S13]            |
| Ni <sub>2</sub> P@Ni-MOF/NF                            | 1.41@100                                                        | [S14]            |
| CoN NF/NF                                              | 1.41@100                                                        | [S15]            |
| FQD/CoNi-LDH/NF                                        | 1.42@100                                                        | [S16]            |
| CoS <sub>x</sub> /Co-MOF                               | 1.43@100                                                        | [S17]            |
| MS-Ni <sub>2</sub> P/Ni <sub>0.96</sub> S/NF           | 1.441@100                                                       | [S18]            |
| CoMoO <sub>4</sub> /Co <sub>9</sub> S <sub>8</sub> /NF | 1.50@100                                                        | [S19]            |

**Table S3.** Comparison of water electrolysis performances of CoS<sub>x</sub>/Ni(OH)<sub>2</sub>/NF with recently reported catalysts.

| Catalysts                                    | Voltage (V) at 10 mA cm <sup>-2</sup> | References       |
|----------------------------------------------|---------------------------------------|------------------|
| <b>CoS<sub>x</sub>/Ni(OH)<sub>2</sub>/NF</b> | <b>1.628</b>                          | <b>This work</b> |
| NiFe/Co(PO <sub>3</sub> ) <sub>2</sub> @NF   | 1.63                                  | [S20]            |
| ZIF-67DC/NiMoCo/CNT                          | 1.64                                  | [S21]            |
| Cu <sub>8</sub> S <sub>5</sub> /NSC          | 1.64                                  | [S22]            |
| CNO@NSG                                      | 1.67                                  | [S23]            |
| FeCoP/NF                                     | 1.67                                  | [S24]            |
| FeNiOH/NF                                    | 1.67                                  | [S25]            |
| Mn-CoP/Co <sub>2</sub> P                     | 1.67                                  | [S26]            |
| Co-Fe-B-P                                    | 1.68                                  | [S27]            |
| CoP/rGO                                      | 1.7                                   | [S1]             |
| Hollow CoP@NC                                | 1.72                                  | [S28]            |

**Table S4.** Comparison of urea electrolysis performances of Mn-Ni<sub>2</sub>P/NiFe LDH with recently reported catalysts.

| Catalysts                                                       | Voltage (V) at 10 mA cm <sup>-2</sup> | References       |
|-----------------------------------------------------------------|---------------------------------------|------------------|
| <b>CoS<sub>x</sub>/Ni(OH)<sub>2</sub>/NF</b>                    | <b>1.485</b>                          | <b>This work</b> |
| CoMn/CoMn <sub>2</sub> O <sub>4</sub>                           | 1.51                                  | [S29]            |
| NiTe <sub>2</sub> /Ni(OH) <sub>2</sub>                          | 1.52                                  | [S30]            |
| Ni-MOF                                                          | 1.52                                  | [S31]            |
| Fe <sub>7</sub> Se <sub>8</sub> @Fe <sub>2</sub> O <sub>3</sub> | 1.55                                  | [S32]            |
| Bulk MnO <sub>2</sub>                                           | 1.55                                  | [S33]            |
| Ni@NCNT-3                                                       | 1.56                                  | [S34]            |
| MnO <sub>2</sub> /MnCo <sub>2</sub> O <sub>4</sub> /Ni          | 1.58                                  | [S35]            |
| FQD/CoNi LDH/NF                                                 | 1.59                                  | [S16]            |
| HC-NiMoS/Ti                                                     | 1.59                                  | [S36]            |
| Ni(OH) <sub>2</sub> NS@NW/NF                                    | 1.68                                  | [S37]            |

#### References

- 1 L. Jiao, Y. X. Zhou, H. L. Jiang, *Chem. Sci.*, 2016, **7**, 1690.
- 2 F. H. Huang, J. Z. Wang, M. Wang, C. Zhang, Y. N. Xue, J. Liu, T. Xu, N. Cai, W. M. Chen, F. Q. Yu, *Colloid Surf. A-Physicochem. Eng. Asp.*, 2021, **623**, 126526.
- 3 Y. J. Qu, M. Y. Yang, J. W. Chai, Z. Tang, M. M. Shao, C. T. Kwok, M. Yang, Z. Y. Wang, D. Chua, S. J. Wang, Z. G. Lu, H. Pan, *ACS Appl. Mater. Interfaces.*, 2017, **9**, 5959.
- 4 J. Zhang, T. Wang, D. Pohl, B. Rellinghaus, R. H. Dong, S. H. Liu, X. D. Zhuang, X. L. Feng, *Angew. Chem. Int. Edit.*, 2016, **55**, 6702.
- 5 W. J. Chu, Z. J. Shi, Y. D. Hou, D. N. Ma, X. Bai, Y. F. Gao, N. J. Yang, *ACS Appl. Mater. Interfaces.*, 2020, **12**, 2763.
- 6 X. L. Liu, P. Wang, Q. Q. Zhang, B. B. Huang, Z. Y. Wang, Y. Y. Liu, Z. K. Zheng, Y. Dai, X. Y. Qin, X. Y. Zhang, *Appl. Surf. Sci.*, 2018, **459**, 422.
- 7 M. Q. Sheng, W. P. Weng, Y. Wang, Q. Wu, S. Y. Hou, *J. Alloy. Compd.*, 2018, **743**, 682.
- 8 M. Q. Zhao, H. F. Dong, Z. H. Chen, Z. P. Ma, L. X. Wang, G. L. Wang, W. Yang, G. J. Shao, *Int. J. Hydrog. Energy.*, 2016, **41**, 20485.
- 9 X. D. Jia, Y. F. Zhao, G. B. Chen, L. Shang, R. Shi, X. F. Kang, G. L. N. Waterhouse, L. Z. Wu, C. H. Tung, T. R. Zhang, *Adv. Energy Mater.*, 2016, **6**, 1502585.
- 10 H. A. Bandal, H. Kim, *J. Colloid Interf. Sci.*, 2022, **627**, 1030.
- 11 K. Zhang, G. Zhang, J. H. Qu, H. J. Liu, *J. Mater. Chem. A.*, 2018, **6**, 10297.
- 12 X. Zhang, Y. Y. Liu, Q. Z. Xiong, G. Q. Liu, C. J. Zhao, G. Z. Wang, Y. X. Zhang, H. M. Zhang, H. J. Zhao, *Electrochim. Acta.*, 2017, **254**, 44.
- 13 Y. Jiang, S. S. Gao, J. L. Liu, G. C. Xu, Q. Jia, F. S. Chen, X. M. Song, *Nanoscale.*, 2020, **12**, 11573.
- 14 H. T. Wang, H. Y. Zou, Y. Y. Liu, Z. L. Liu, W. S. Sun, K. A. Lin, T. L. Li, S. J. Luo, *Sci. Rep.*, 2021, **11**, 21414.
- 15 Y. M. Chen, P. J. Sun, W. W. Xing, *J. Chem. Sci.*, 2019, **131**, 101.
- 16 Y. Q. Feng, X. Wang, J. F. Huang, P. P. Dong, J. Ji, J. Li, L. Y. Cao, L. L. Feng, P. Jin, C. R. Wang, *Chem. Eng. J.*, 2020, **390**, 124525.
- 17 H. Z. Xu, K. Ye, K. Zhu, J. L. Yin, J. Yan, G. L. Wang, D. X. Cao, *Inorg. Chem. Front.*, 2020, **7**, 2602.
- 18 M. X. He, C. Q. Feng, T. Liao, S. N. Hu, H. M. Wu, Z. Q. Sun, *ACS Appl. Mater. Inter.*, 2020, **12**, 2225.
- 19 X. Q. Du, C. R. Huang, X. S. Zhang, *Int. J. Hydrog. Energy.*, 2019, **44**, 19595.
- 20 F. Gu, Q. Zhang, X. H. Chen, T. Li, H. C. Fu, H. Q. Luo, N. B. Li, *Int. J. Hydrog. Energy.*, 2022, **47**, 28475.
- 21 C. Zhang, Z. Xu, Y. C. Yu, A. C. Long, X. L. Ge, Y. K. Song, Y. R. An, Y. Y. Gu, *Electrochim. Acta.*, 2022, **424**, 140613.
- 22 Y. L. Zhang, L. Chen, B. Yan, F. P. Zhang, Y. L. Shi, X. H. Guo, *Chem. Eng. J.*, 2023, **45**, 138497.

- 23 H. Q. Li, H. H. Fu, J. Yu, L. P. Wang, Y. L. Shi, L. Chen, *J. Alloy. Compd.*, 2022, **922**, 166254.
- 24 L. H. Shen, S. H. Tang, L. M. Yu, Q. K. Huang, T. L. Zhou, S. Yang, H. L. Yu, H. X. Xiong, M. J. Xu, X. Zhong, L. Zhang, *J. Solid State Chem.*, 2022, **314**, 123434.
- 25 J. T. Ren, G. G. Yuan, C. C. Weng, L. Chen, Z. Y. Yuan, *Nanoscale.*, 2018, **10**, 10620.
- 26 F. Tang, Y. W. Zhao, Y. Ge, Y. G. Sun, Y. Zhang, X. L. Yang, A. M. Cao, J. H. Qiu, X. J. Lin, *J. Colloid Interface Sci.*, 2022, **628**, 524.
- 27 Z. X. Wu, D. Z. Nie, M. Song, T. T. Jiao, G. T. Fu, X. E. Liu, *Nanoscale.*, 2019, **11**, 7506.
- 28 Y. Y. Xie, M. Q. Chen, M. K. Cai, J. Teng, H. F. Huang, Y. N. Fan, M. Barboiu, D. W. Wang, C. Y. Su, *Inorg. Chem.*, 2019, **58**, 14652.
- 29 C. Wang, H. L. Lu, Z. Y. Mao, C. L. Yan, G. Z. Shen, X. F. Wang, *Adv. Funct. Mater.*, 2020, **30**, 2000556.
- 30 B. Xu, X. D. Yang, X. P. Liu, W. X. Song, Y. Q. Sun, Q. S. Liu, H. X. Yang, C. C. Li, *J. Power Sources*, 2020, **449**, 227585.
- 31 S. S. Zheng, Y. Zheng, H. G. Xue, H. Pang, *Chem. Eng. J.*, 2020, **395**, 125166.
- 32 J. X. Li, X. Q. Du, X. S. Zhang, Z. P. Wang, *Int. J. Hydrog. Energy.*, 2022, **47**, 35203.
- 33 S. Chen, J. J. Duan, A. Vasileff, S. Z. Qiao, *Angew. Chem. Int. Edit.*, 2016, **55**, 3804.
- 34 Q. Zhang, F. M. D. Kazim, S. X. Ma, K. G. Qu, M. Li, Y. G. Wang, H. Hu, W. W. Cai, Z. H. Yang, *Appl. Catal. B- Environ.*, 2021, **280**, 119436.
- 35 C. L. Xiao, S. Li, X. Y. Zhang, D. R. MacFarlane, *J. Mater. Chem. A.*, 2017, **5**, 7825.
- 36 X. X. Wang, J. M. Wang, X. P. Sun, S. Wei, L. Cui, W. R. Yang, J. Q. Liu, *Nano Res.*, 2018, **11**, 988.
- 37 Z. H. Yue, S. Y. Yao, Y. Z. Li, W. X. Zhu, W. T. Zhang, R. Wang, J. Wang, L. J. Huang, D. Y. Zhao, J. L. Wang, *Electrochim. Acta.*, 2018, **268**, 211.
